# Supplementary material
Source: MDPI journal article supplement (https://www.mdpi.com/1999-4907/12/10/1403)
Supplement: s1 [file s1]

## **Supplementary material**

Article title: **Differential response of macrobenthic abundance and community composition to mangrove vegetation**

Author names: **Sin-He Pan, Chuan-Wen Ho, Chiao-Wen Lin, Shou-Chung Huang and Hsing-Juh Lin**

Corresponding author: **Hsing-Juh Lin**

Department of Life Sciences and Innovation and Development Center of Sustainable Agriculture, National Chung Hsing University, Taichung 40227, Taiwan

[hjlin@dragon.nchu.edu.tw](mailto:hjlin@dragon.nchu.edu.tw)

Table S1. List of taxa in the macrobenthic community identified in the four sites on the western coast of Taiwan and their corresponding living and feeding habits based on Cai [1] and the World Register of Marine Species (WoRMS) [2].

| Phylum    | Class or Order    | Taxon                        | Living habit | Feeding habit | Functional group |
|-----------|-------------------|------------------------------|--------------|---------------|------------------|
| Sipuncula | Phascolosomatidea | <i>Phascolosoma arcuatum</i> | free         | detritivore   | Infauna          |
| Cnidaria  | Actiniaria        |                              | attached     | omnivore      | Epifauna         |
| Nemertea  |                   |                              | free         | carnivore     | Infauna          |
| Annelida  | Oligochaeta       |                              | free         | detritivore   | Infauna          |
|           | Polychaeta        | Capitellidae                 | free         | detritivore   | Infauna          |
|           |                   | Cossuridae                   | free         | detritivore   | Infauna          |
|           |                   | Maldanidae                   | free         | detritivore   | Infauna          |
|           |                   | Eunicidae                    | free         | carnivore     | Infauna          |
|           |                   | Lumbrineridae                | free         | carnivore     | Infauna          |
|           |                   | Glyceridae                   | free         | carnivore     | Infauna          |
|           |                   | Goniadidae                   | free         | carnivore     | Infauna          |
|           |                   | Nereididae                   | free         | carnivore     | Infauna          |
|           |                   | Ampharetidae                 | tube dweller | detritivore   | Infauna          |
|           |                   | Cirratulidae                 | free         | detritivore   | Infauna          |
|           |                   | Orbiniidae                   | free         | detritivore   | Infauna          |
|           |                   | Sabellidae                   | tube dweller | filter feeder | Infauna          |
|           |                   | Spionidae                    | free         | detritivore   | Infauna          |

Table S1. continued.

| Phylum | Class or Order | Taxon | Living habit | Feeding habit | Functional group |
|--------|----------------|-------|--------------|---------------|------------------|
|--------|----------------|-------|--------------|---------------|------------------|

|          |            |                             |          |               |          |
|----------|------------|-----------------------------|----------|---------------|----------|
| Mollusca | Bivalvia   | Shellfish larvae            | attached | filter feeder | Infauna  |
|          |            | Ostreidae                   | attached | filter feeder | Infauna  |
|          |            | Tellinidae                  | attached | filter feeder | Infauna  |
|          |            | Laternulidae                | attached | filter feeder | Infauna  |
|          |            | Corbulidae                  | attached | filter feeder | Infauna  |
|          |            | Cyrenidae                   | attached | filter feeder | Infauna  |
|          |            | <i>Glaucanome chinensis</i> | attached | filter feeder | Infauna  |
|          |            | Veneridae                   | attached | filter feeder | Infauna  |
|          | Gastropoda | Lymnaeidae                  | free     | detritivore   | Epifauna |
|          |            | <i>Acteocina koyasensis</i> | free     | herbivore     | Epifauna |
|          |            | Ellobiidae                  | free     | herbivore     | Epifauna |
|          |            | <i>Peronia verruculata</i>  | free     | detritivore   | Epifauna |
|          |            | <i>Batillaria zonalis</i>   | free     | detritivore   | Epifauna |
|          |            | <i>Pirenella alata</i>      | free     | detritivore   | Epifauna |
|          |            | <i>Pirenella cingulata</i>  | free     | detritivore   | Epifauna |
|          |            | Assimineidae                | free     | herbivore     | Epifauna |
|          |            | <i>Iravadia quadrasi</i>    | free     | herbivore     | Epifauna |
|          |            | <i>Iravadia reflecta</i>    | free     | herbivore     | Epifauna |

Table S1. continued.

| Phylum     | Class or Order | Taxon                    | Living habit | Feeding habit | Functional group |
|------------|----------------|--------------------------|--------------|---------------|------------------|
| Mollusca   | Gastropoda     | <i>Hyala bella</i>       | free         | detritivore   | Epifauna         |
|            |                | Littorinidae             | free         | herbivore     | Epifauna         |
|            |                | Naticidae                | free         | carnivore     | Epifauna         |
|            |                | Stenothyridae            | free         | herbivore     | Epifauna         |
|            |                | Conidae                  | free         | carnivore     | Epifauna         |
|            |                | <i>Reishia clavigera</i> | free         | carnivore     | Epifauna         |
| Arthropoda | Tanaidacea     |                          | free         | detritivore   | Epifauna         |
|            | Isopoda        |                          | free         | detritivore   | Epifauna         |
|            | Amphipoda      | Aoridae                  | free         | detritivore   | Epifauna         |
|            |                | Corophiidae              | free         | detritivore   | Epifauna         |
|            |                | Ischyroceridae           | free         | detritivore   | Epifauna         |
|            |                | Microprotopidae          | free         | detritivore   | Epifauna         |
|            |                | Photidae                 | free         | detritivore   | Epifauna         |
|            |                | Talitridae               | free         | detritivore   | Epifauna         |
|            | Decapoda       | Penaeidae                | free         | detritivore   | Epifauna         |
|            |                | Alpheidae                | free         | omnivore      | Epifauna         |
|            |                | Diogenidae               | free         | detritivore   | Epifauna         |
|            |                | Juvenile crab            | free         | omnivore      | Epifauna         |

Table S1. continued.

| Phylum     | Class or Order | Taxon                             | Living habit | Feeding habit | Functional group |
|------------|----------------|-----------------------------------|--------------|---------------|------------------|
| Arthropoda | Decapoda       | <i>Mictyris brevidactylus</i>     | free         | detritivore   | Epifauna         |
|            |                | <i>Tmethypocoelis ceratophora</i> | free         | detritivore   | Epifauna         |
|            |                | <i>Ilyograpsus paludicola</i>     | free         | detritivore   | Epifauna         |
|            |                | Ocypodidae                        | free         | detritivore   | Epifauna         |
|            |                | Sesarmidae                        | free         | omnivore      | Epifauna         |
|            |                | Helice formosensis                | free         | omnivore      | Epifauna         |
|            |                | <i>Pseudohelice subquadrata</i>   | free         | herbivore     | Epifauna         |
|            |                | <i>Metaplex longipes</i>          | free         | carnivore     | Epifauna         |
|            |                | Grapsidae                         | free         | omnivore      | Epifauna         |
|            | Xiphosurida    | Limulidae                         | free         | omnivore      | Epifauna         |
|            | Diptera        | Psychodoidea larvae               | free         | detritivore   | Infauna          |
|            |                | Dolichopodidae larvae             | free         | carnivore     | Infauna          |
|            |                | Chironomidae pupae                | free         | omnivore      | Infauna          |
|            | Sessilia       | Balanidae                         | attached     | filter feeder | Epifauna         |
| Chordata   | Perciformes    | Gobiidae                          | free         | carnivore     | Epifauna         |
| Arthropoda | Decapoda       | <i>Tmethypocoelis ceratophora</i> | free         | detritivore   | Epifauna         |
|            |                | <i>Ilyograpsus paludicola</i>     | free         | detritivore   | Epifauna         |
|            |                | Ocypodidae                        | free         | detritivore   | Epifauna         |
|            |                | Sesarmidae                        | free         | omnivore      | Epifauna         |

Table S2. Analysis of the difference in macrobenthic variables between the mangrove forests and nonvegetated mudflats at the four sites on the western coast of Taiwan by Student's *t*-test (*t*-test) or the Wilcoxon rank-sum test (Wilcoxon). The bold values indicate significant differences ( $p < 0.05$ ).

| Variable                         | Site | <i>p</i> value   | Difference         | Statistical method   |
|----------------------------------|------|------------------|--------------------|----------------------|
| Density                          | XF   | 0.939            |                    | <b><i>t</i>-test</b> |
|                                  | ZN   | <b>&lt;0.001</b> | Mangrove < Mudflat | Wilcoxon             |
|                                  | BD   | 0.275            |                    | <b><i>t</i>-test</b> |
|                                  | BM   | <b>0.032</b>     | Mangrove > Mudflat | <b><i>t</i>-test</b> |
| Crab density                     | XF   | <b>0.012</b>     | Mangrove < Mudflat | Wilcoxon             |
|                                  | ZN   | <b>&lt;0.001</b> | Mangrove < Mudflat | Wilcoxon             |
|                                  | BD   | <b>&lt;0.001</b> | Mangrove < Mudflat | Wilcoxon             |
|                                  | BM   | <b>&lt;0.001</b> | Mangrove < Mudflat | Wilcoxon             |
| Taxon number<br>(richness)       | XF   | 0.903            |                    | Wilcoxon             |
|                                  | ZN   | <b>&lt;0.001</b> | Mangrove < Mudflat | Wilcoxon             |
|                                  | BD   | 0.508            |                    | Wilcoxon             |
|                                  | BM   | <b>0.015</b>     | Mangrove > Mudflat | <b><i>t</i>-test</b> |
| Shannon-Weiner<br>diversity (H') | XF   | 0.952            |                    | Wilcoxon             |
|                                  | ZN   | <b>&lt;0.001</b> | Mangrove < Mudflat | Wilcoxon             |
|                                  | BD   | 0.729            |                    | Wilcoxon             |
|                                  | BM   | <b>0.024</b>     | Mangrove > Mudflat | <b><i>t</i>-test</b> |

Table S3. Analysis of the seasonal and site effects on the macrobenthic variables in the mangrove forests on the western coast of Taiwan by the Kruskal-Wallis test. Dunn's test was used to determine which season or site showed a significant difference. The bold values indicate significant differences ( $p < 0.05$ ).

| Variable                         | Factor | df | <i>H</i> | <i>p</i> value   | Dunn's test                                                          |
|----------------------------------|--------|----|----------|------------------|----------------------------------------------------------------------|
| Density                          | season | 3  | 1.066    | 0.785            |                                                                      |
|                                  | site   | 3  | 101.516  | <b>&lt;0.001</b> | XF <sup>a</sup> ZN <sup>b</sup> BD <sup>a</sup> BM <sup>c</sup>      |
| Crab density                     | season | 3  | 13.191   | <b>0.004</b>     | win <sup>ab</sup> spr <sup>a</sup> sum <sup>b</sup> aut <sup>b</sup> |
|                                  | site   | 3  | 8.468    | <b>0.037</b>     | no separation                                                        |
| Taxon number<br>(richness)       | season | 3  | 5.541    | 0.136            |                                                                      |
|                                  | site   | 3  | 125.669  | <b>&lt;0.001</b> | XF <sup>a</sup> ZN <sup>a</sup> BD <sup>a</sup> BM <sup>b</sup>      |
| Shannon-Weiner<br>diversity (H') | season | 3  | 5.662    | 0.129            |                                                                      |
|                                  | site   | 3  | 128.049  | <b>&lt;0.001</b> | ZN <sup>a</sup> XF <sup>b</sup> BD <sup>ab</sup> BM <sup>c</sup>     |

Table S4. Analysis of the seasonal and site effects on the macrobenthic variables in the nonvegetated mudflats on the western coast of Taiwan by two-way ANOVA (*F* value) or the Kruskal-Wallis test (*H* value). Tukey's or Dunn's test was used to determine which season or site showed a significant difference. The bold values indicate significant differences ( $p < 0.05$ ).

| Variable                         | Factor        | df | <i>F</i> | <i>H</i> | <i>p</i> value | Tukey test/ Dunn's test                                          |
|----------------------------------|---------------|----|----------|----------|----------------|------------------------------------------------------------------|
| Density                          | season        | 3  | -        | 5.036    | 0.169          |                                                                  |
|                                  | site          | 3  | -        | 12.853   | <b>0.005</b>   | XF <sup>a</sup> ZN <sup>b</sup> BD <sup>a</sup> BM <sup>ab</sup> |
| Crab density                     | season        | 3  | 5.062    | -        | <b>0.006</b>   |                                                                  |
|                                  | site          | 3  | 2.332    | -        | 0.096          |                                                                  |
|                                  | season x site | 9  | 4.259    | -        | <b>0.001</b>   |                                                                  |
| Taxon number<br>(richness)       | season        | 3  | -        | 3.447    | 0.328          |                                                                  |
|                                  | site          | 3  | -        | 8.407    | <b>0.038</b>   | no separation                                                    |
| Shannon-Weiner<br>diversity (H') | season        | 3  | -        | 3.292    | 0.349          |                                                                  |
|                                  | site          | 3  | -        | 7.721    | 0.052          |                                                                  |

Table S5. Comparisons of the densities of *Kandelia obovata* and macrobenthos observed in this study and other studies. FY: Fangyuan, ZN: Zhunan, XF: Xinfeng, GD: Guandu, ZW: Zhuwei, and WZ: Wazihwei. The locations of the study sites in Taiwan are shown in Fig. S1.

| Site                         | Location          | Tree density<br>(ind. m <sup>-2</sup> ) | Macrobenthic<br>density<br>(ind. m <sup>-2</sup> ) | Infaunal<br>density<br>(ind. m <sup>-2</sup> ) | Epifaunal<br>density<br>(ind. m <sup>-2</sup> ) | Source            |
|------------------------------|-------------------|-----------------------------------------|----------------------------------------------------|------------------------------------------------|-------------------------------------------------|-------------------|
| Futian mangrove, China       | 22°32'N, 114°03'E | 0.23                                    | 13265                                              | 12776                                          | 489                                             | [3]               |
| Qi'ao Island mangrove, China | 22°25'N, 113°37'E | 2.35                                    | 711                                                | -                                              | -                                               | [4]               |
| Dazhou Island, China         | 24°24'N, 117°55'E | 4.00                                    | 200                                                | 51                                             | 149                                             | [5]               |
| Tai O mangrove, Hong Kong    | 22°15'N, 115°51'E | 0.60                                    | 7679                                               | 7305                                           | 374                                             | [6]               |
| FY, Taiwan                   | 23°55'N, 120°18'E | 2.07                                    | 146                                                | 130                                            | 16                                              | [7]               |
| ZN, Taiwan                   | 24°40'N, 120°50'E | 1.91                                    | 1330                                               | 1139                                           | 191                                             | this study (2018) |
| ZN, Taiwan                   | 24°40'N, 120°50'E | 1.69                                    | 1626                                               | 1288                                           | 339                                             | this study (2019) |
| XF, Taiwan                   | 24°54'N, 120°58'E | 2.39                                    | 1030                                               | 762                                            | 268                                             | this study (2018) |
| XF, Taiwan                   | 24°54'N, 120°58'E | 2.21                                    | 1517                                               | 1087                                           | 430                                             | this study (2019) |
| GD, Taiwan                   | 25°7'N, 121°27'E  | 0.65                                    | 5407                                               | -                                              | -                                               | [8]               |
| ZW, Taiwan                   | 25°8'N, 121°27'E  | 2.29                                    | 2575                                               | -                                              | -                                               | [8]               |
| ZW, Taiwan                   | 25°8'N, 121°27'E  | 1.00                                    | 1538                                               | 1388                                           | 149                                             | [9]               |
| WZ, Taiwan                   | 25°9'N, 121°25'E  | 1.26                                    | 171                                                | -                                              | -                                               | [8]               |
| WZ, Taiwan                   | 25°9'N, 121°25'E  | 0.52                                    | 1728                                               | 1557                                           | 171                                             | [10]              |



Table S6. Comparisons of *Avicennia marina* tree and pneumatophore density and the density of macrobenthos in this study and other studies. CK: Chiku, BM: Beimen, BD: Budai, and FY: Fangyuan. The locations of the study sites in Taiwan are shown in Figure S1.

| Site                           | Location          | Tree density<br>(trees m <sup>-2</sup> ) | Pneumatophore<br>density<br>(ind. m <sup>-2</sup> ) | Macrobenthic<br>density<br>(ind. m <sup>-2</sup> ) | Infaunal<br>density<br>(ind. m <sup>-2</sup> ) | Epifaunal<br>density<br>(ind. m <sup>-2</sup> ) | Source            |
|--------------------------------|-------------------|------------------------------------------|-----------------------------------------------------|----------------------------------------------------|------------------------------------------------|-------------------------------------------------|-------------------|
| Puhinui Creek, New Zealand     | 35°34'S, 174°30'E | 2.09                                     | 140                                                 | 1932                                               | -                                              | -                                               | [11]              |
| Matapouri Estuary, New Zealand | 36°99'S, 174°80'E | 0.38                                     | 359                                                 | 7298                                               | 1715                                           | -                                               | [12]              |
| Segara Anakan Lagoon, Java     | 7°48'S, 109°03'E  | 0.12                                     | -                                                   | 882                                                | 262                                            | 620                                             | [13]              |
| Segara Anakan Lagoon, Java     | 7°48'S, 109°03'E  | 0.73                                     | -                                                   | 356                                                | 216                                            | 140                                             | [13]              |
| Zhanjiang mangrove, China      | 21°35'N, 110°35'E | 1.00                                     | -                                                   | 125                                                | -                                              | -                                               | [14]              |
| Zhanjiang mangrove, China      | 21°52'N, 109°77'E | 0.33                                     | -                                                   | 133                                                | -                                              | -                                               | [15]              |
| Tai O mangrove, Hong Kong      | 22°15'N, 115°51'E | -                                        | 750                                                 | 8395                                               | 7987                                           | 408                                             | [6]               |
| Futian mangrove, China         | 22°32'N, 114°03'E | 0.26                                     | 250                                                 | 13400                                              | 12906                                          | 494                                             | [3]               |
| CK, Taiwan                     | 23°7'N, 120°5'E   | 0.32                                     | -                                                   | 11132                                              | 10343                                          | 789                                             | [16]              |
| BM, Taiwan                     | 23°29'N, 120°11'E | 0.59                                     | 119                                                 | 1178                                               | 476                                            | 702                                             | this study (2019) |
| BM, Taiwan                     | 23°29'N, 120°11'E | 0.31                                     | 245                                                 | 4830                                               | 3485                                           | 1344                                            | this study (2019) |
| BD, Taiwan                     | 23°36'N, 120°13'E | 0.61                                     | 119                                                 | 1880                                               | 303                                            | 1577                                            | this study (2018) |
| BD, Taiwan                     | 23°36'N, 120°13'E | 0.35                                     | 245                                                 | 3059                                               | 2046                                           | 1012                                            | this study (2018) |
| FY, Taiwan                     | 23°56'N, 120°18'E | 0.50                                     | 259                                                 | 973                                                | 334                                            | 639                                             | [7]               |
| FY, Taiwan                     | 23°56'N, 120°18'E | 1.11                                     | 409                                                 | 1170                                               | 872                                            | 298                                             | [7]               |

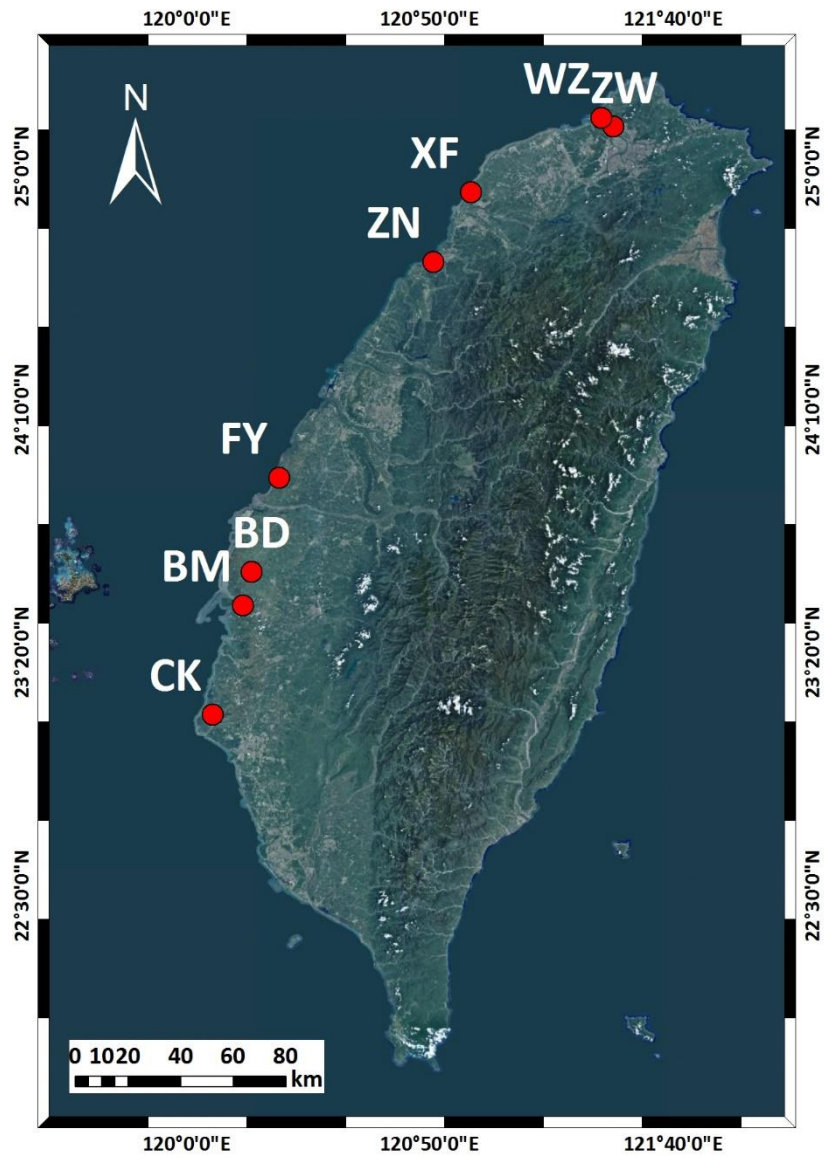

Figure S1. Locations of the study sites on the western coast of Taiwan. From north to south: WZ, Wazihwei; ZW, Zhuwei; XF, Xinfeng; ZN, Zhunan; FY, Fangyuan; BD, Budai; BM, Beimen; CK, Chiku. GD (Guandu) overlaps with ZW. Among these sites, XF, ZN, BD and BM were sampled in this study.

## References

1. Cai, L.Z. Zoobenthic Ecology in Shenzhen Bay. Xiamen University Press, Xiamen. **2015**.
2. The World Register of Marine Species. Available online: <http://www.marinespecies.org/> (accessed on 27 July 2021).
3. Leung, J.; Tam, N. Influence of plantation of an exotic mangrove species, *Sonneratia caseolaris* (L.) Engl., on macrobenthic infaunal community in Futian Mangrove National Nature Reserve, China. *J. Exp. Mar. Biol. Ecol.* **2013**, *448*, 1-9. <https://doi.org/10.1016/j.jembe.2013.06.006>
4. Tang, Y.; Fang, Z.; Chen, K.; Zhang, Z.; Zhong, Y.; An, D.; Yang, X.; Liao, B. Ecological influence of exotic plants of *Sonneratia apetala* on understory macrofauna. *Acta Oceanol. Sin.* **2012**, *30*, 115-125. <https://doi.org/10.1007/s13131-012-0242-8>
5. Feng, J.; Guo, J.; Huang, Q.; Jiang, J.; Huang, G.; Yang, Z.; Lin, G. Changes in the community structure and diet of benthic macrofauna in invasive *Spartina alterniflora* wetlands following restoration with native mangroves. *Wetlands*. **2014**, *34*, 673-683. <https://doi.org/10.1007/s13157-014-0533-2>
6. Leung, J.Y.S. Habitat heterogeneity determining the macrobenthic infaunal community in a mangrove swamp in South China: Implication for plantation and plant invasion. *J. Coastal Res.* **2015**, *31*, 624-633. <https://doi.org/10.2112/JCOASTRES-D-13-00091.1>
7. Kuo, C.C. Effects of tree thinning and mangrove species on benthic macrofaunal community (Doctoral dissertation). National Chung Hsing University, Master thesis. **2016**.
8. Hsieh, H.L. Chapter 6: Macrobenthos. In: Chen, C.P.; Lin, J.G.; Yang, P.S.; Wu, J.T.; Hsieh, H.L., Pang, Y.X. (Eds.), Community Dynamics in the Downstream of the Danshui River. Environmental Protection Administration of Taiwan. **1998**, pp. 1-58.
9. Huang, S.C. Resource investigation in the Mangrove Nature Reserve of the Danshui River. Luodong Forest District Office, Forestry Bureau, Council of Agriculture of Taiwan. **2017**.
10. Huang, S.C. Ecological resources monitoring in the Wazhiwei Nature Reserve. Agriculture Department, New Taipei City Government, Taiwan. **2018**.
11. Alfaro, A.C. Benthic macro-invertebrate community composition within a mangrove/seagrass estuary in northern New Zealand. *Estuar. Coast Shelf Sci.* **2006**, *66*, 97-110. <https://doi.org/10.1016/j.ecss.2005.07.024>
12. Morrissey, D.J.; Skilleter, G.A.; Ellis, J.I.; Burns, B.R.; Kemp, C.E.; Burt, K. Differences in benthic fauna and sediment among mangrove (*Avicennia marina* var. *australasica*) stands of different ages in New Zealand. *Estuar. Coast. Shelf S.* **2003**, *56*, 581-592. [https://doi.org/10.1016/S0272-7714\(02\)00208-1](https://doi.org/10.1016/S0272-7714(02)00208-1)
13. Nordhaus, I.; Hadipudjana, F.A.; Janssen, R.; Pamungkas, J. Spatio-temporal variation of macrobenthic communities in the mangrove-fringed Segara Anakan lagoon, Indonesia, affected by anthropogenic activities. *Reg. Environ. Change.* **2009**, *9*, 291-313. <https://doi.org/10.1007/s10113-009-0097-5>
14. Chen, Q.; Li, J.; Zhang, L.; Lu, H.; Ren, H.; Jian, S. Changes in the macrobenthic faunal community during succession of a mangrove forest at Zhanjiang, South China. *J. Coastal Res.* **2015**, *31*, 315-325. <https://doi.org/10.2112/JCOASTRES-D-13-00019.1>
15. Chen, Q.; Jian, S.; Ma, K. Differences in macrobenthic faunal communities in mangrove wetland habitats (Zhanjiang, China) invaded and non-invaded by exotic cordgrass *Spartina alterniflora*. *Ecol. Res.* **2018**, *33*, 1113-1123. <https://doi.org/10.1007/s11284-018-1624-y>
16. Yu, S.P.; Lin, H.J. Relationships between bird foraging and benthic communities on intertidal

flats. *J. Wetlands*. **2015**, 4, 65-80. <https://www.airitilibrary.com/Publication/alDetailedMesh?docid=P20151104001-201512-201604010003-201604010003-65-80>
